# Supplementary material
Source: PubMed Central journal article supplement (PMC9378476)
Supplement: NIHMS1810691-supplement-1.pdf [file NIHMS1810691-supplement-1.pdf]

Supplemental Table 1

| Patient Study Set (year of publication) <sup>ref</sup> | No. Operatively managed patients | Case Findings                                |                                                                                                                      |                                            |                                                                                                                                                                                                            |
|--------------------------------------------------------|----------------------------------|----------------------------------------------|----------------------------------------------------------------------------------------------------------------------|--------------------------------------------|------------------------------------------------------------------------------------------------------------------------------------------------------------------------------------------------------------|
|                                                        |                                  | <i>Pre-op Clinical Manifestations</i>        | <i>Lymphatic Imaging/ Diagnostics</i>                                                                                | <i>Surgical/ Interventional Management</i> | <i>Documented Outcome(s)</i>                                                                                                                                                                               |
| Study 1 (1978) <sup>13</sup>                           | 1                                | Cardiac defects; cryptorchidism; chylothorax | CXR: Chylothorax.<br>Autopsy: aplastic thoracic duct w/ collaterals                                                  | Closure of thoracic chylous leakage        | Attempted but with poor results, patient died a few weeks later before LAG could be performed                                                                                                              |
| Study 2 (1980) <sup>14</sup>                           | 1                                | Perineal/genital lymphedema                  | C-LAG: Pelvic lymphangiectasia with hypoplastic nodes, inguinal collaterals, right popliteal lymphocele              | Inguinal lymph node biopsy                 | Development of a lymphocutaneous fistula, recurrent chylometrorrhea, and lymphedema of the left labia majora                                                                                               |
| Study 3 (1980) <sup>15</sup>                           | 2                                | Cardiac defects (n=2)                        | CXR (n=2): Bilateral fine reticulonodular pattern (n=2), abnormal pleural effusion (n=2), retrosternal density (n=1) | Cardiac surgery (n=2)                      | Prominent mediastinal lymphatics observed (n=2); immediate post-op chylothorax following unintentional incision of dilated lymph vessels (n=1); 3-year development of lymphedema and chylometrorrhea (n=1) |

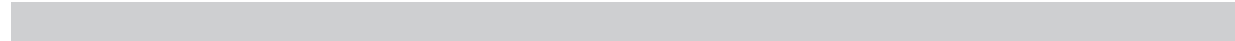

|                                       |           |                                                                                                                     |                                                                                                                                                                                                                                                                                                                     |                                                                        |                                                                                                                                               |
|---------------------------------------|-----------|---------------------------------------------------------------------------------------------------------------------|---------------------------------------------------------------------------------------------------------------------------------------------------------------------------------------------------------------------------------------------------------------------------------------------------------------------|------------------------------------------------------------------------|-----------------------------------------------------------------------------------------------------------------------------------------------|
| <b>Study 4<br/>(1998)<sup>7</sup></b> | <b>1*</b> | Cardiac defects;<br>cryptorchidism;<br>lymphedema;<br>ascites;<br>perineal/genital<br>edema; genital<br>lymphorrhea | MRL: Diffuse<br>pelvic/retrope<br>ritoneal<br>lymphangiecta<br>sia.<br><br>LAS: Thoracic<br>duct<br>abnormality,<br>perineal<br>reflux, lower<br>extremity<br>lymphoceles,<br>reduced<br>lymph flow<br>rate.<br><br>C-LAG:<br>abnormal<br>lymphatics,<br>dilated<br>abdominal<br>and peri-<br>aortic<br>collaterals | Abdominal LVA                                                          | Excellent lymphatic flow<br>through anastomosis;<br>good recovery; reduced<br>scrotal swelling and<br>vesicular discharge                     |
| Study 5<br>(2016) <sup>4</sup>        | <b>2</b>  | Cardiac defects<br>(n=2);<br>lymphedema<br>(n=1); genital<br>lymphorrhea<br>(n=1)                                   | LAS, Venous<br>Duplex US<br>(results<br>unavailable -<br>Pt 3 and 8)                                                                                                                                                                                                                                                | Cardiac surgery<br>+ intraoperative<br>thoracic duct<br>ligation (n=1) | Acute right chylothorax;<br>protein losing enteropathy<br>and cachexia; death at age<br>56 from congestive heart<br>failure (6 years post-op) |
|                                       |           |                                                                                                                     |                                                                                                                                                                                                                                                                                                                     | Scrotoplasty<br>(n=1)                                                  | Reduced chylous leakage;<br>persistence of occasional<br>penile leakage                                                                       |

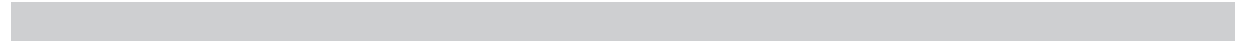

|                              |   |                                                                      |                                                                                                                                                                                                                                                                        |                                                                                          |                                                                                                                                                                                                    |
|------------------------------|---|----------------------------------------------------------------------|------------------------------------------------------------------------------------------------------------------------------------------------------------------------------------------------------------------------------------------------------------------------|------------------------------------------------------------------------------------------|----------------------------------------------------------------------------------------------------------------------------------------------------------------------------------------------------|
| Study 6 (2018) <sup>16</sup> | 1 | Lymphedema, LLQ abdominal lympho-cutaneous fistulae; chylocolporrhea | <p>C-LAG: Lymphangiectasia; lymph connection into vaginal lumen.</p> <p>CT: Contrast enhancement /leakage into vagina.</p> <p>LAS: Increased pelvic/perineal accumulation, absent thoracic duct</p>                                                                    | Lymphatic lipiodol embolization                                                          | Immediate cessation of chylocolporrhea; no serious procedural complications; 12 months without recurrence                                                                                          |
| Study 7 (2019) <sup>8</sup>  | 7 | Cardiac defects (n=6); chylothorax (n=6); ascites (n=3)              | <p>C-LAG (n=7): Abnormal thoracic duct (n=7), pulmonary perfusion (n=6), peritoneal perfusion (n=1), left neck collaterals (n=1).</p> <p>MRL/dc-MRL (n=9): Pulmonary perfusion (n=6), abnormal thoracic duct (n=5), soft tissue edema (n=4), ascites (n=4), dermal</p> | <p>Lymphatic lipiodol embolization (n=4) or glue embolization (n=2)</p> <p>LVA (n=1)</p> | <p>Worsening effusions and death (n=2); improved or stable condition (n=4)</p> <p>Resolution of effusion; transferred to local hospital with continued diet modification and diuretics regimen</p> |



|                              |    |                                                                                                                                               |                                                                                                                                                                                                                |                                          |                                                                                                                                                                           |
|------------------------------|----|-----------------------------------------------------------------------------------------------------------------------------------------------|----------------------------------------------------------------------------------------------------------------------------------------------------------------------------------------------------------------|------------------------------------------|---------------------------------------------------------------------------------------------------------------------------------------------------------------------------|
|                              |    |                                                                                                                                               | backflow (n=3)                                                                                                                                                                                                 |                                          |                                                                                                                                                                           |
| Study 8 (2020) <sup>17</sup> | 1  | Cardiac defects; chylothorax (post-op I)                                                                                                      | <p>ICG: Upper extremity lymphatics not visualized, unable to identify leakage site behind post-op chylothorax.</p> <p>dc-MRL: Thoracic duct dilation, central lymphatic leakage at T9 paravertebral region</p> | Cardiac Surgery I                        | Bilateral post-op chylothorax; 50-150mL/day continuous chest tube drainage                                                                                                |
|                              |    |                                                                                                                                               |                                                                                                                                                                                                                | Thoracic Duct Ligation (25 days post-op) | Decreased chest tube drainage to 10-15mL/day; Post-op intermittent fevers, elevated WBC, thrombocytopenia, septicemia                                                     |
|                              |    |                                                                                                                                               |                                                                                                                                                                                                                | Cardiac Surgery II (4 months post-op)    | Severe ascites with 600-1500mL/day continuous drainage; dx of juvenile myelomonocytic leukemia; death due to bradycardic arrest (32 days post-op)                         |
| Study 9 (2021) <sup>6</sup>  | 2* | <p>Cardiac defects (n=1); cryptorchidism (n=2); lymphedema (n=2); ascites (n=1); genital lymphorrhea (n=1); lymphocutaneous fistula (n=1)</p> | <p>CTL: Dilated thoracic duct, peri-aortic and mediastinal lymph vessels.</p> <p>MRL: Dilated thoracic duct, retro-peritoneal lymphangiectasia.</p> <p>LAS: Reduced lymph flow rate, left inguinal reflux</p>  | Abdominal LVA (P1, 12-year follow-up)    | Gradual onset new non-chylous leakage and scrotal edema                                                                                                                   |
|                              |    |                                                                                                                                               |                                                                                                                                                                                                                | Interventional lymphatic sclerosis (P1)  | Discontinued due to lack of demonstrable communication; acute post-operative pelvic/abdominal hemorrhage requiring microcoil embolization of left superior gluteal artery |



|                                     |   |                                                                                                                                  |                                                                                                                                                                                                                            |                                      |                                                                                                                                                                                                                                                                                                                                     |
|-------------------------------------|---|----------------------------------------------------------------------------------------------------------------------------------|----------------------------------------------------------------------------------------------------------------------------------------------------------------------------------------------------------------------------|--------------------------------------|-------------------------------------------------------------------------------------------------------------------------------------------------------------------------------------------------------------------------------------------------------------------------------------------------------------------------------------|
|                                     |   |                                                                                                                                  | to the scrotum;<br>lower extremity lymphoceles                                                                                                                                                                             |                                      |                                                                                                                                                                                                                                                                                                                                     |
|                                     |   |                                                                                                                                  | CXR:<br>Prominent hilar vasculature, discrete left chylothorax, severe dextroscoliosis.<br><br>LAS: Retroperitoneal/mediastinal vascular malformation                                                                      | Inguinal LVA (P2, 20-year follow-up) | Long-term regression of lower extremity lymphedema from class II-III to a class 0-I, six episodes of erysipelas, chylothorax                                                                                                                                                                                                        |
| <i>Study 10 (2021)</i> <sup>9</sup> | 1 | Cardiac defects, Severe pulmonary insufficiency and decline over 2 years, chylothoraces, bronchial lymphangiectasia, lymphedema, | dc-MRL:<br>Significant abdominal and pulmonary lymphangiectasias, abdominal ascites<br><br>C-LAG:<br>Increased pelvic and retroperitoneal lymphatic flow, complete occlusion of the thoracic duct at the level of the neck | Cervical LVA                         | Immediate: Pulmonary edema secondary to fluid overload requiring endotracheal intubation, extubated next day, discharged post-op day 9.<br><br>40-days: Repeat imaging encouraging for reduced lymphatic reflux findings<br><br>1-year: Better exercise tolerance, improved quality of life, return to baseline oxygen requirements |

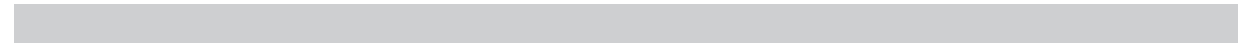

|  |  |  |                                                                                                                                 |  |  |
|--|--|--|---------------------------------------------------------------------------------------------------------------------------------|--|--|
|  |  |  | Post-op dc-MRL: patent thoracic duct, significantly reduced pulmonary lymphangiectasias, near complete resolution of lymphedema |  |  |
|--|--|--|---------------------------------------------------------------------------------------------------------------------------------|--|--|

Table Legend:

CXR= Chest X-Ray; C-LAG = Conventional Oil-Contrast Lymphangiography; CT = Computerized Tomography; MRL = T2-Weighted Magnetic Resonance Lymphography; dc-MRL = Dynamic-Contrast (T1-Weighted) Magnetic Resonance Lymphography; LAS = Lymphoscintigraphy; ICG = Indocyanin Green Lymphography; LVA = Lympho-Venous Anastomosis

Journal Pre-proof
